# Supplementary material
Source: Research Square preprint supplement (doi:10.21203/rs.3.rs-9892833/v1)
Supplement: Supplementary file 1 [file b5a5f23d4e9f7d4e6c412ab5.docx]

| **Table 1.** Participant Characteristics | | | | | | | | |
| --- | --- | --- | --- | --- | --- | --- | --- | --- |
| Parameter |  | Total (n=1383) |  | Male Participants (n=679) |  | Female Participants (n=704) |  | *P* |
| Age (y) |  | 67.13 ± 5.28 |  | 67.45 ± 5.25 |  | 66.82 ± 5.29 |  | 0.026 |
| Height (m) |  | 1.63 ± 0.07 |  | 1.69 ± 0.06 |  | 1.58 ± 0.05 |  | <.001 |
| Weight (kg) |  | 63.04 ± 10.98 |  | 67.52 ± 10.42 |  | 58.71 ± 9.69 |  | <.001 |
| BMI (kg/m2) |  | 23.55 ± 3.36 |  | 23.72 ± 3.14 |  | 23.39 ± 3.56 |  | 0.067 |
| Smoking history (no. of patients) |  |  |  |  |  |  |  |  |
| Never |  | 1,097 (79.3%) |  | 397 (58.5%） |  | 700 (99.4%) |  |  |
| Former |  | 102 (7.4%) |  | 100 (14.7%) |  | 2 (0.3%) |  |  |
| Current |  | 184 (13.3%) |  | 182 (26.8%) |  | 2 (0.3%) |  |  |
| FEV1 (L) |  | 2.40 ± 0.50 |  | 2.77 ± 0.38 |  | 2.04 ± 0.29 |  | <.001 |
| FEV1% pred (%) |  | 0.96 ± 0.11 |  | 0.96 ± 0.11 |  | 0.95 ± 0.11 |  | 0.083 |
| FVC (L) |  | 2.93 ± 0.62 |  | 3.37 ± 0.49 |  | 2.51 ± 0.39 |  | <.001 |
| FEV1/FVC |  | 81.62 ± 6.55 |  | 81.48 ± 6.8 |  | 81.75 ± 6.28 |  | 0.456 |
| TLV (L) |  | 3.72 ± 1.15 |  | 4.31 ± 1.11 |  | 3.16 ± 0.86 |  | <.001 |
| Pi10 (mm) |  | 1.19 ± 0.09 |  | 1.21 ± 0.08 |  | 1.17 ± 0.09 |  | <.001 |
| WT (mm) |  | 1.29 ± 0.10 |  | 1.31 ± 0.09 |  | 1.27 ± 0.10 |  | <.001 |
| LA (mm2) |  | 20.66 ± 6.27 |  | 21.67 ± 6.66 |  | 19.69 ± 5.72 |  | <.001 |
| WA% (%) |  | 65.24 ± 3.17 |  | 65.37 ± 3.27 |  | 65.12 ± 3.07 |  | 0.146 |
| Note: Except where indicated, data are means ± SDs. Data in parentheses are percentages. P values are for t test comparisons between male and female participants. α = .0038 for significance after Bonferroni correction.  **Abbreviations:**BMI = body mass index (calculated as weight in kilograms divided by height in meters squared), FEV1 = forced expiratory volume in 1 second, FEV₁% pred, percent predicted forced expiratory volume in 1 second; FVC = forced vital capacity, TLV = total lung volume, Pi10 = square root of the wall area of a hypothetical airway with an internal perimeter of 10 mm, WT = wall thickness, LA = luminal area, WA% = wall area percentage, *P =* *P* value. | | | | | | | | |

| **Table 2.** Reference Bronchial Parameter Percentiles Split by Age and Sex | | | | | | | | | | | | |  |
| --- | --- | --- | --- | --- | --- | --- | --- | --- | --- | --- | --- | --- | --- |
|  |  |  | Age (y) | | | | | | | | | | |
| Parameter | |  | 60-64 | |  | 65-69 | |  | 70-74 | |  | ≥75 | |
|  |  |  | Male | Female |  | Male | Female |  | Male | Female |  | Male | Female |
| No. of participants | |  | 227 | 266 |  | 207 | 245 |  | 167 | 125 |  | 78 | 68 |
| Pi10 |  |  |  |  |  |  |  |  |  |  |  |  |  |
|  | 10th percentile |  | 1.09 | 1.07 |  | 1.12 | 1.08 |  | 1.13 | 1.09 |  | 1.11 | 1.05 |
|  | 25th percentile |  | 1.13 | 1.11 |  | 1.17 | 1.12 |  | 1.18 | 1.13 |  | 1.16 | 1.09 |
|  | 50th percentile |  | 1.18 | 1.16 |  | 1.22 | 1.16 |  | 1.22 | 1.18 |  | 1.21 | 1.14 |
|  | 75th percentile |  | 1.24 | 1.22 |  | 1.27 | 1.22 |  | 1.27 | 1.23 |  | 1.26 | 1.21 |
|  | 90th percentile |  | 1.31 | 1.28 |  | 1.32 | 1.29 |  | 1.34 | 1.29 |  | 1.31 | 1.26 |
| WT |  |  |  |  |  |  |  |  |  |  |  |  |  |
|  | 10th percentile |  | 1.15 | 1.13 |  | 1.22 | 1.16 |  | 1.23 | 1.17 |  | 1.19 | 1.12 |
|  | 25th percentile |  | 1.22 | 1.19 |  | 1.28 | 1.21 |  | 1.29 | 1.23 |  | 1.25 | 1.17 |
|  | 50th percentile |  | 1.29 | 1.25 |  | 1.33 | 1.26 |  | 1.32 | 1.29 |  | 1.30 | 1.22 |
|  | 75th percentile |  | 1.37 | 1.33 |  | 1.38 | 1.34 |  | 1.37 | 1.33 |  | 1.34 | 1.31 |
|  | 90th percentile |  | 1.41 | 1.40 |  | 1.43 | 1.38 |  | 1.40 | 1.39 |  | 1.39 | 1.36 |
| LA |  |  |  |  |  |  |  |  |  |  |  |  |  |
|  | 10th percentile |  | 13.25 | 12.53 |  | 13.70 | 12.66 |  | 13.18 | 11.92 |  | 12.27 | 12.29 |
|  | 25th percentile |  | 16.78 | 15.81 |  | 17.95 | 16.48 |  | 16.76 | 14.88 |  | 15.16 | 14.59 |
|  | 50th percentile |  | 20.90 | 18.96 |  | 21.94 | 19.73 |  | 20.34 | 19.00 |  | 20.20 | 17.71 |
|  | 75th percentile |  | 24.99 | 22.88 |  | 26.00 | 24.09 |  | 27.47 | 22.61 |  | 23.59 | 21.57 |
|  | 90th percentile |  | 28.85 | 27.55 |  | 31.32 | 27.46 |  | 31.68 | 26.66 |  | 27.62 | 26.47 |
|  |  |  |  |  |  |  |  |  |  |  |  |  |  |
|  |  |  | Age (y) | | | | | | | | | | |
| Parameter | |  | 60-64 | |  | 65-69 | |  | 70-74 | |  | ≥75 | |
|  |  |  | Male | Female |  | Male | Female |  | Male | Female |  | Male | Female |
| WA% |  |  |  |  |  |  |  |  |  |  |  |  |  |
|  | 10th percentile |  | 61.85 | 61.57 |  | 61.51 | 61.57 |  | 61.12 | 61.51 |  | 61.62 | 60.87 |
|  | 25th percentile |  | 63.24 | 63.11 |  | 63.04 | 63.00 |  | 62.45 | 62.98 |  | 64.13 | 62.25 |
|  | 50th percentile |  | 64.78 | 64.71 |  | 64.79 | 64.59 |  | 65.01 | 65.05 |  | 66.17 | 64.52 |
|  | 75th percentile |  | 66.78 | 66.48 |  | 67.05 | 66.36 |  | 68.54 | 67.24 |  | 68.20 | 67.75 |
|  | 90th percentile |  | 69.03 | 69.94 |  | 69.60 | 68.91 |  | 70.70 | 70.14 |  | 70.30 | 69.47 |
| Note: Data are percentile values.  **Abbreviations:**Pi10 = square root of the wall area of a hypothetical airway with an internal perimeter of 10 mm, WT = wall thickness, LA = luminal area, WA% = wall area percentage. | | | | | | | | | | | | | |

| **Table 3**. Univariable Linear Regression and Correlation Analysis for Bronchial Parameters with Participant Characteristics | | | | | | | | | | | | | | | | | | | |
| --- | --- | --- | --- | --- | --- | --- | --- | --- | --- | --- | --- | --- | --- | --- | --- | --- | --- | --- | --- |
| Parameter | Age | | |  | Height | | |  | Weight | | |  | BMI | | |  | Smoking | | |
| β* | *r²* | *P* |  | β | *r²* | *P* |  | β | *r²* | *P* |  | β | *r²* | *P* |  | β | *r²* | *P* |
| Male participants | |  |  |  |  |  |  |  |  |  |  |  |  |  |  |  |  |  |  |
| Pi10 | 0.02 | 0.01 | 0.005 |  | 0.16 | 0.01 | 0.004 |  | 0.01 | 0.02 | <.001 |  | 0.002 | 0.01 | 0.019 |  | 0.01 | 0.01 | 0.023 |
| WT | 0.01 | 0.01 | 0.025 |  | 0.12 | 0.005 | 0.040 |  | 0.005 | 0.002 | 0.149 |  | <.001 | 0.001 | 0.671 |  | -0.004 | <.001 | 0.548 |
| LA | 0.14 | 0.001 | 0.775 |  | 0.65 | 0.001 | 0.884 |  | -1.19 | 0.03 | <.001 |  | -0.48 | 0.05 | <.001 |  | -0.79 | 0.002 | 0.126 |
| WA% | 0.27 | <.001 | 0.251 |  | 3.41 | 0.002 | 0.122 |  | 0.65 | 0.04 | <.001 |  | 0.22 | 0.04 | <.001 |  | 0.55 | 0.01 | 0.031 |
| FEV1 | -0.02 | <.001 | 0.398 |  | 3.12 | 0.22 | <.001 |  | 0.08 | 0.04 | <.001 |  | -0.002 | 0.001 | 0.686 |  | 0.05 | 0.003 | 0.072 |
| FVC | -0.08 | 0.01 | 0.035 |  | 3.95 | 0.21 | <.001 |  | 0.11 | 0.06 | <.001 |  | 0.01 | <.001 | 0.337 |  | 0.03 | <.001 | 0.394 |
| FEV1/FVC | 1.06 | 0.01 | 0.033 |  | -16.25 | 0.02 | <.001 |  | -1.08 | 0.03 | <.001 |  | -0.26 | 0.01 | 0.002 |  | -1.64 | 0.01 | 0.002 |
| Female participants | |  |  |  |  |  |  |  |  |  |  |  |  |  |  |  |  |  |  |
| Pi10 | -0.003 | 0.001 | 0.627 |  | 0.12 | 0.003 | 0.071 |  | 0.01 | 0.02 | <.001 |  | 0.003 | 0.02 | 0.001 |  | 0.01 | 0.001 | 0.790 |
| WT | -0.01 | <.001 | 0.220 |  | 0.13 | 0.003 | 0.094 |  | 0.01 | 0.01 | 0.020 |  | 0.002 | 0.003 | 0.073 |  | 0.02 | 0.001 | 0.677 |
| LA | -0.33 | <.001 | 0.420 |  | 3.44 | <.001 | 0.418 |  | -1.08 | 0.03 | <.001 |  | -0.34 | 0.04 | <.001 |  | -1.21 | 0.001 | 0.674 |
| WA% | -0.04 | 0.001 | 0.861 |  | 0.10 | 0.001 | 0.966 |  | 0.58 | 0.03 | <.001 |  | 0.17 | 0.04 | <.001 |  | -0.39 | 0.001 | 0.802 |
| FEV1 | -0.01 | 0.002 | 0.692 |  | 2.95 | 0.28 | <.001 |  | 0.06 | 0.04 | <.001 |  | <-.001 | 0.001 | 0.864 |  | 0.07 | 0.001 | 0.607 |
| FVC | -0.04 | 0.002 | 0.148 |  | 4.07 | 0.28 | <.001 |  | 0.08 | 0.04 | <.001 |  | -0.002 | 0.001 | 0.684 |  | 0.07 | 0.001 | 0.731 |
| FEV1/FVC | 0.76 | 0.003 | 0.090 |  | -12.40 | 0.01 | 0.008 |  | -0.15 | 0.00 | 0.542 |  | 0.03 | 0.001 | 0.674 |  | 1.52 | 0.001 | 0.629 |
| **Abbreviations:** BMI = body mass index (calculated as weight in kilograms divided by height in meters squared), Smoking status was categorized as never smoking = 1, former smoking = 2, and current smoking = 3, Pi10 = square root of the wall area of a hypothetical airway with an internal perimeter of 10 mm, WT = wall thickness, LA = luminal area, WA% = Wall area percentage, FEV1 = forced expiratory volume in 1 second, FVC = forced vital capacity, β = unstandardized regression coefficient, *r*² = coefficient of determination; *P= P* value.  * Per 10-unit increase. | | | | | | | | | | | | | | | | | | | |

| **Table 4.** Multivariable Linear Regression Analysis for Bronchial Parameters | | | | | | | | | | | | | | | | | | | |
| --- | --- | --- | --- | --- | --- | --- | --- | --- | --- | --- | --- | --- | --- | --- | --- | --- | --- | --- | --- |
| Parameter | Pi10 (mm) | | | |  | WT (mm) | | | |  | LA (mm2) | | | |  | WA (%) | | | |
| β | beta | *R2* | *P* |  | β | beta | *R2* | *P* |  | β | beta | *R2* | *P* |  | β | beta | *R2* | *P* |
| Overall Model |  |  | 0.079 | <.001 |  |  |  | 0.056 | <.001 |  |  |  | 0.069 | <.001 |  |  |  | 0.044 | <.001 |
| Sex | -0.02 | -0.11 |  | 0.006 |  | -0.03 | -0.17 |  | <.001 |  | -2.16 | -0.17 |  | <.001 |  | 0.20 | 0.03 |  | 0.428 |
| Age (y)* | 0.01 | 0.05 |  | 0.058 |  | 0.004 | 0.02 |  | 0.435 |  | -0.002 | 0.000 |  | 0.996 |  | 0.11 | 0.02 |  | 0.501 |
| Height (m) | 0.06 | 0.06 |  | 0.180 |  | 0.09 | 0.07 |  | 0.096 |  | 14.22 | 0.17 |  | <.001 |  | -3.95 | -0.09 |  | 0.023 |
| Weight (kg) | 0.01 | 0.13 |  | <.001 |  | 0.01 | 0.05 |  | 0.097 |  | -1.47 | -0.26 |  | <.001 |  | 0.71 | 0.25 |  | <.001 |
| Smoking (former) | 0.01 | 0.03 |  | 0.233 |  | 0.01 | 0.01 |  | 0.659 |  | -0.33 | -0.01 |  | 0.624 |  | 0.35 | 0.03 |  | 0.31 |
| Smoking (current) | 0.02 | 0.06 |  | 0.025 |  | -0.01 | -0.03 |  | 0.318 |  | -1.08 | -0.06 |  | 0.044 |  | 0.63 | 0.07 |  | 0.023 |
| Note: The adjusted *R2* values and *F* statistic *P* values are shown for the overall model. For each independent variable, the coefficients are shown with their corresponding *P* values. Sex was coded as male = 0 and female = 1. Smoking status was categorized as never, former, and current smoking.  **Abbreviations:** Pi10 = square root of the wall area of a hypothetical airway with an internal perimeter of 10 mm, WT = wall thickness, LA = luminal area, WA% = Wall area percentage, β = unstandardized regression coefficient, beta = standardized regression coefficient; *R2 =* adjusted *R2*; *P = P* value.  * Per 10-unit increase. | | | | | | | | | | | | | | | | | | | |
